# Supplementary material
Source: PubMed Central journal article supplement (PMC2982680)

Figure S1

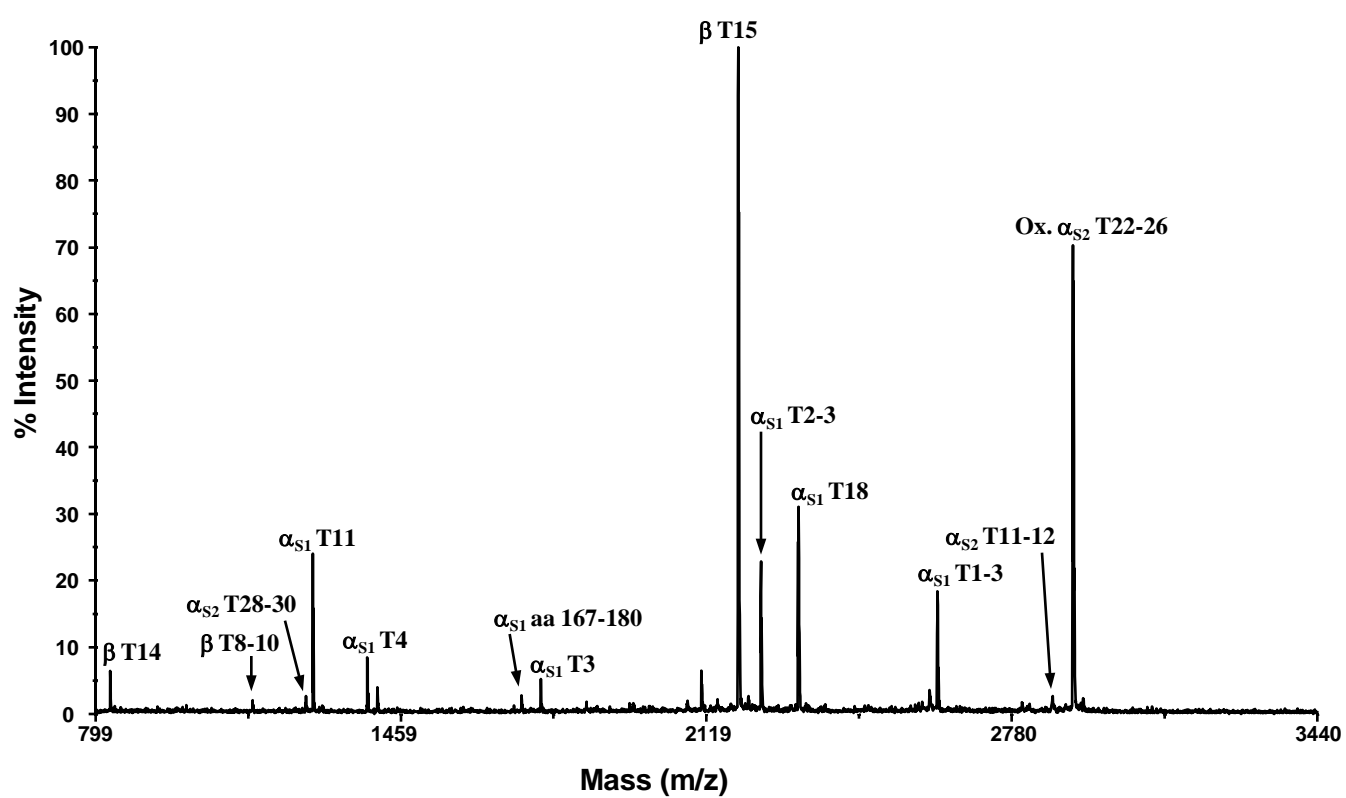

Figure S2

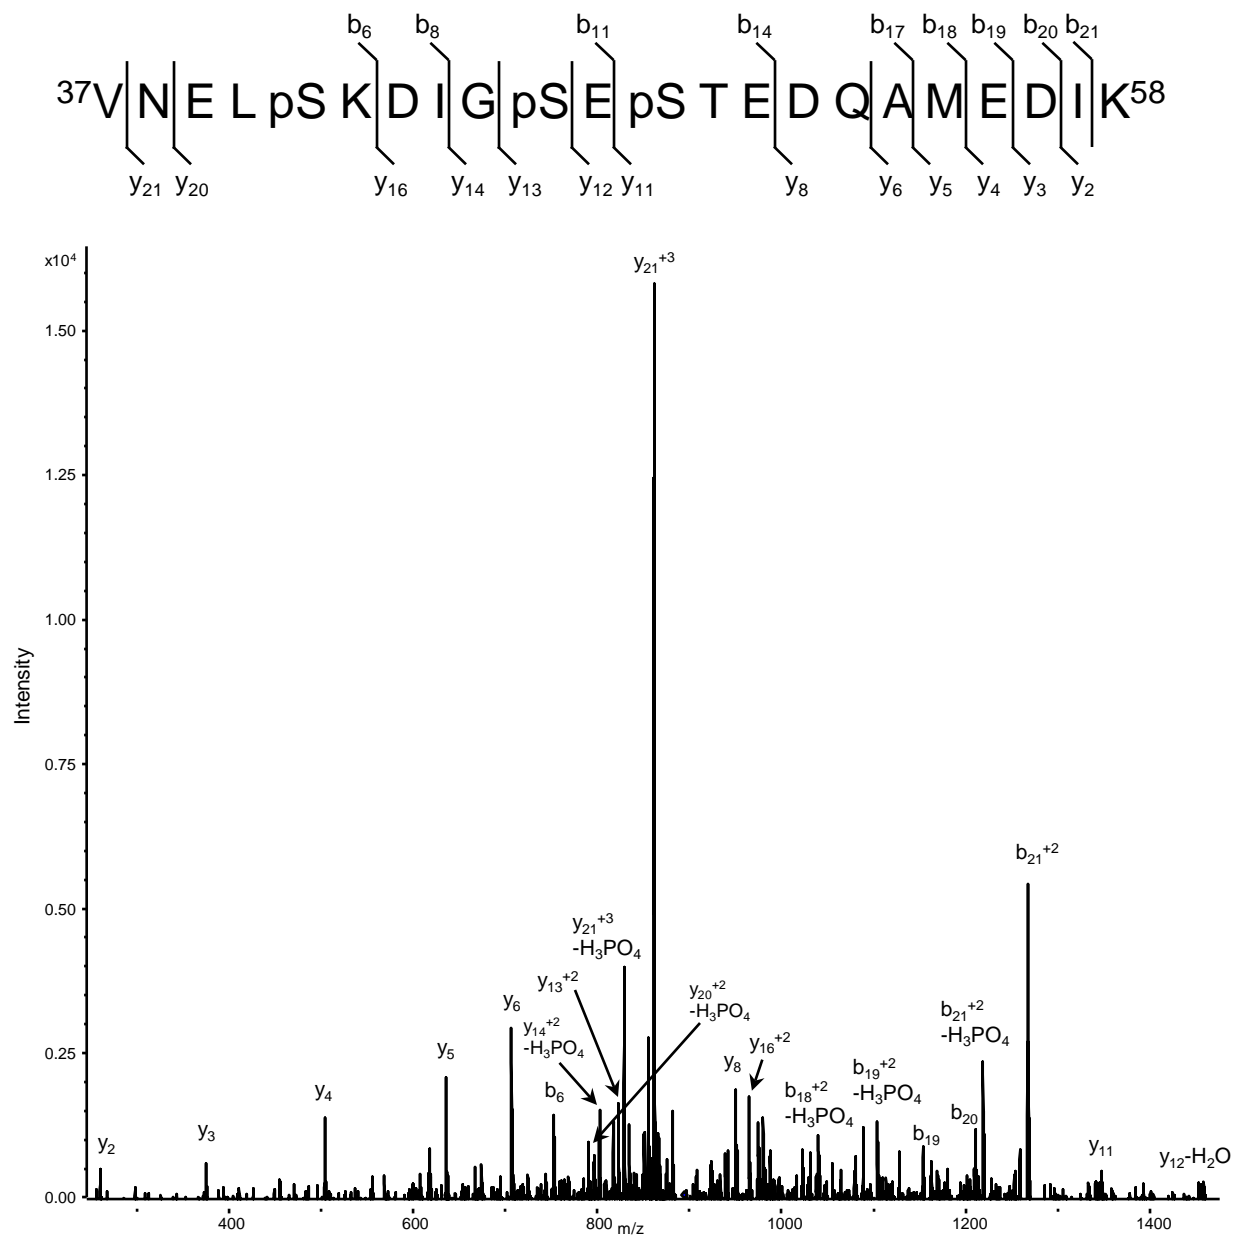

Figure S3

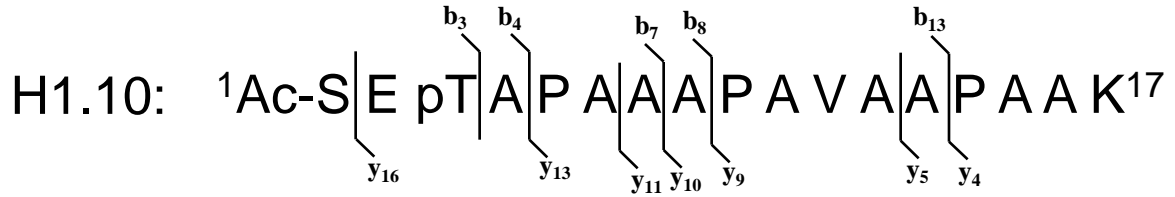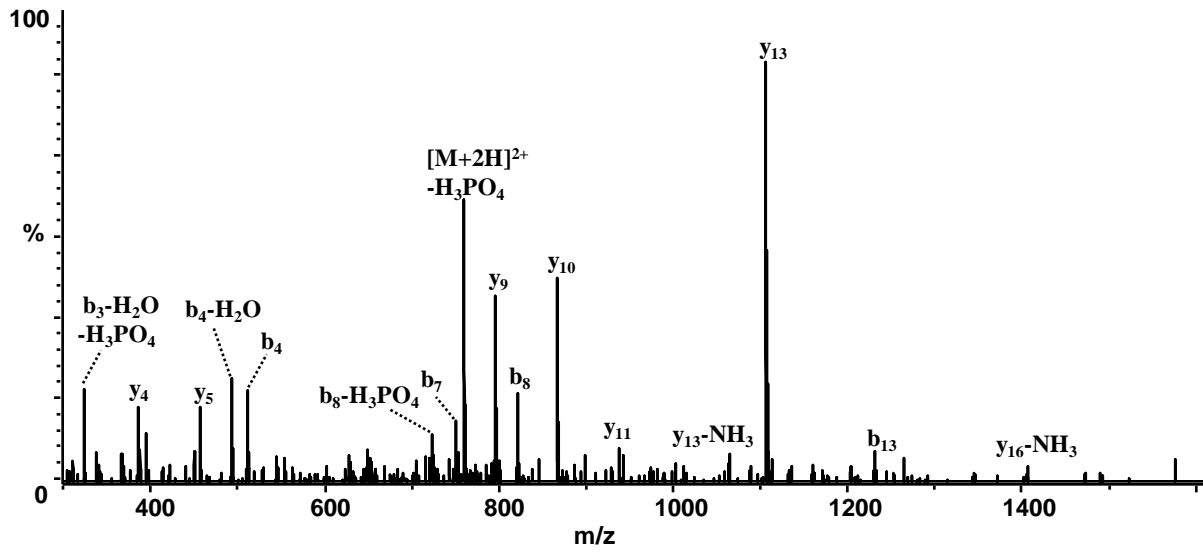



Figure S5

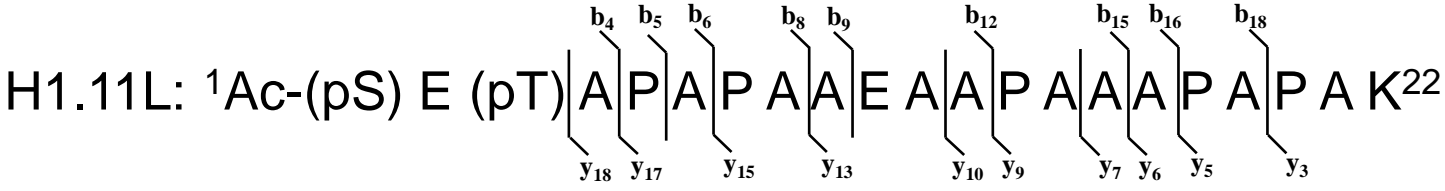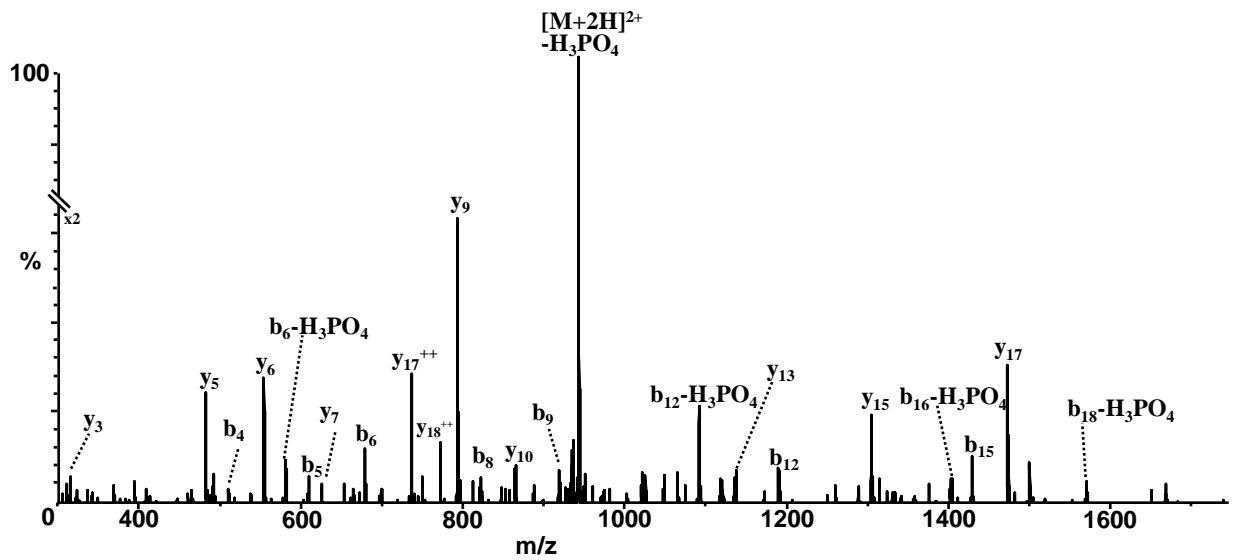









Figure S9

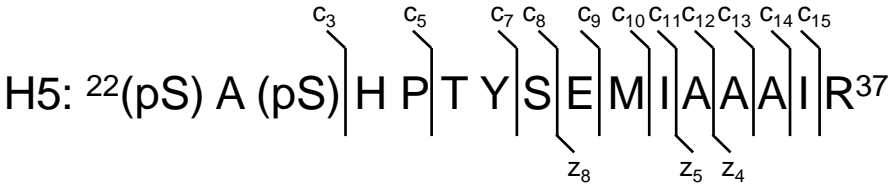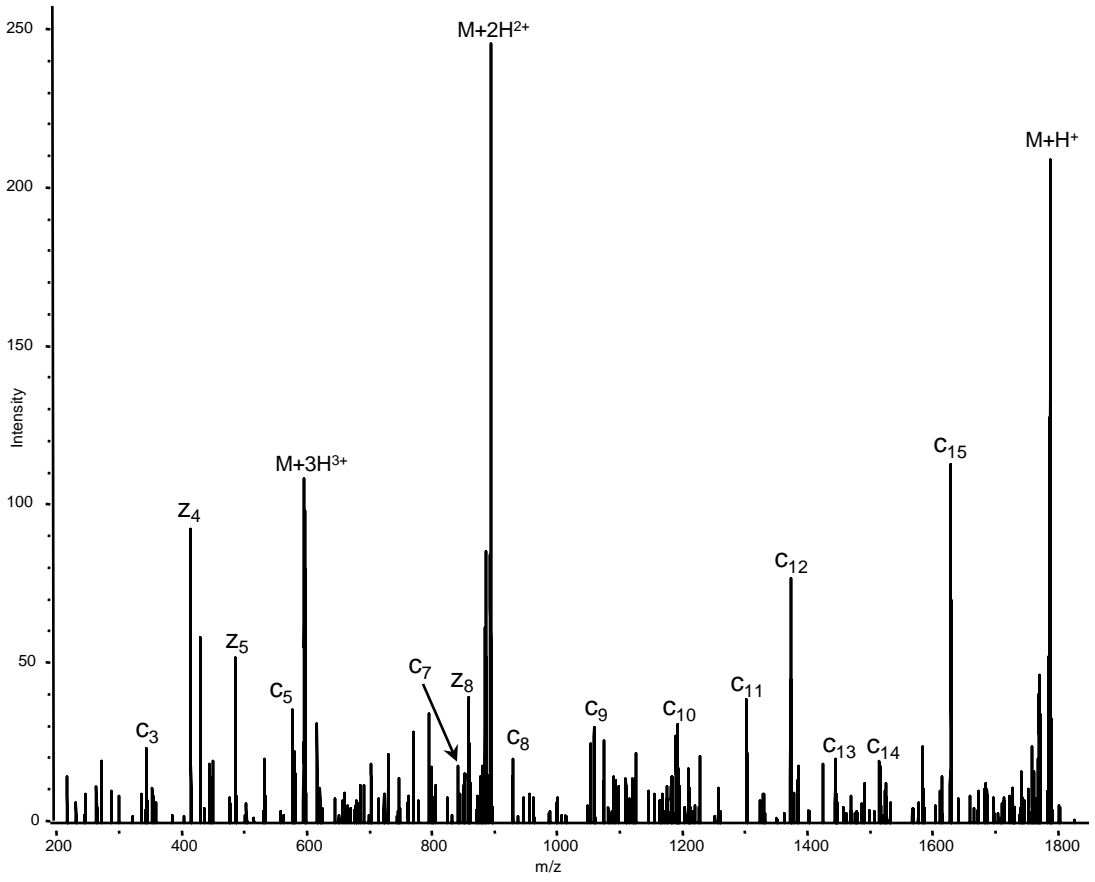

Supplement: NIHMS242196-supplement-supplement.pdf [file NIHMS242196-supplement-supplement.pdf]
